# Supplementary material
Source: PubMed Central journal article supplement (PMC4276439)

Figure S1

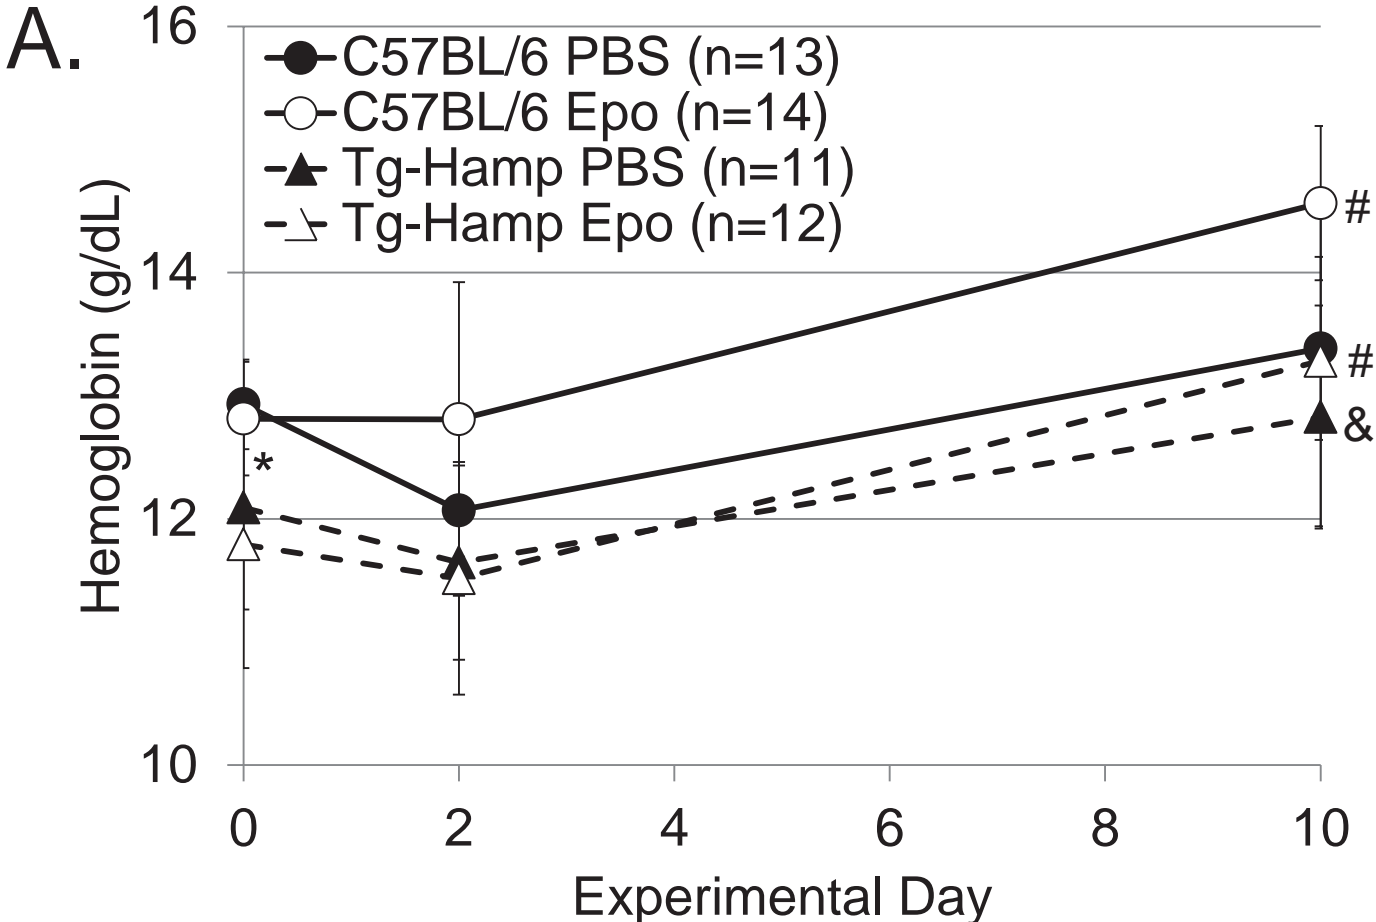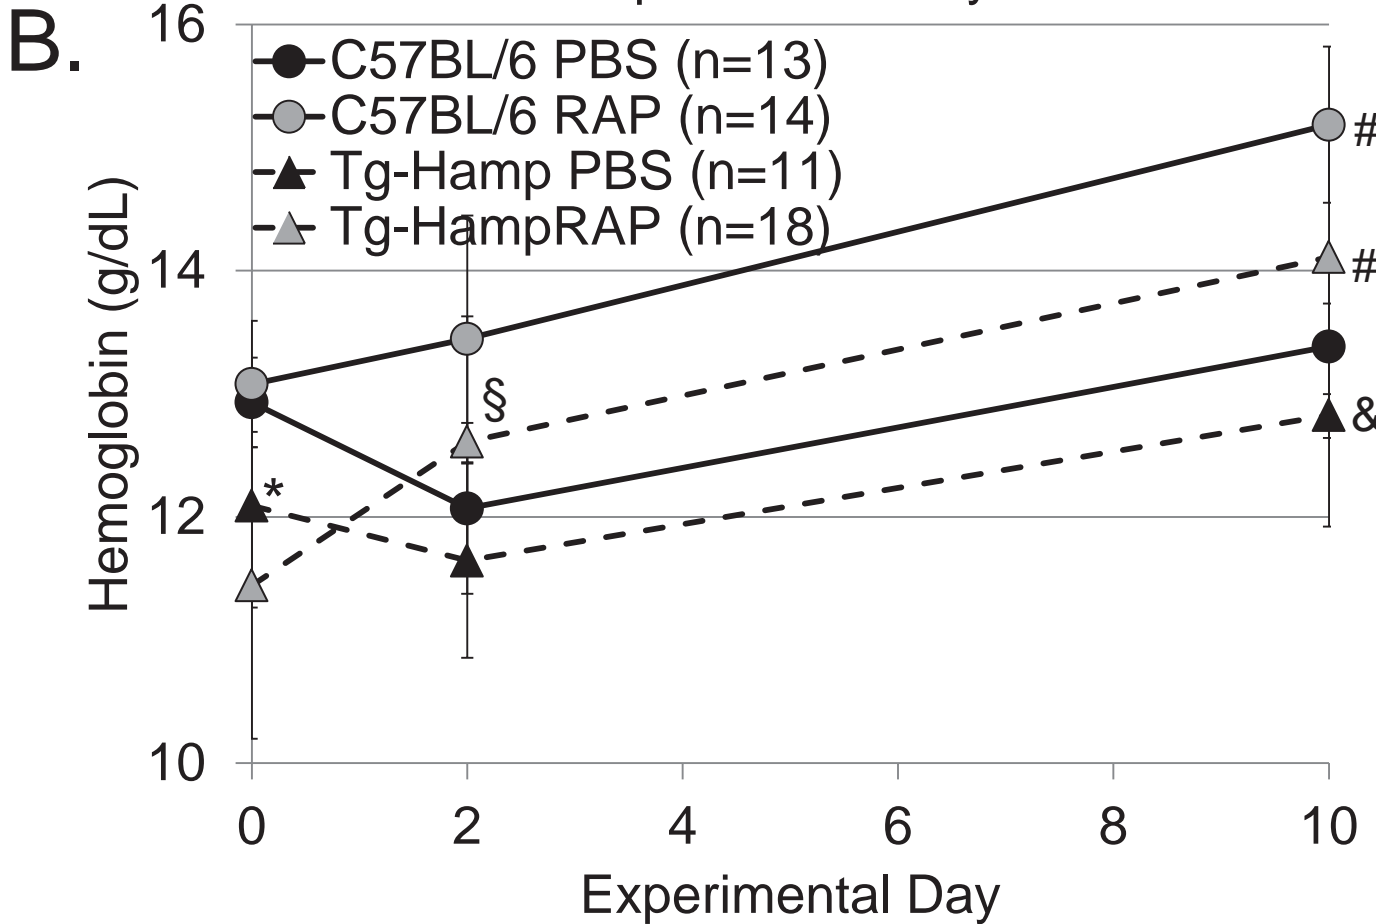

Figure S2

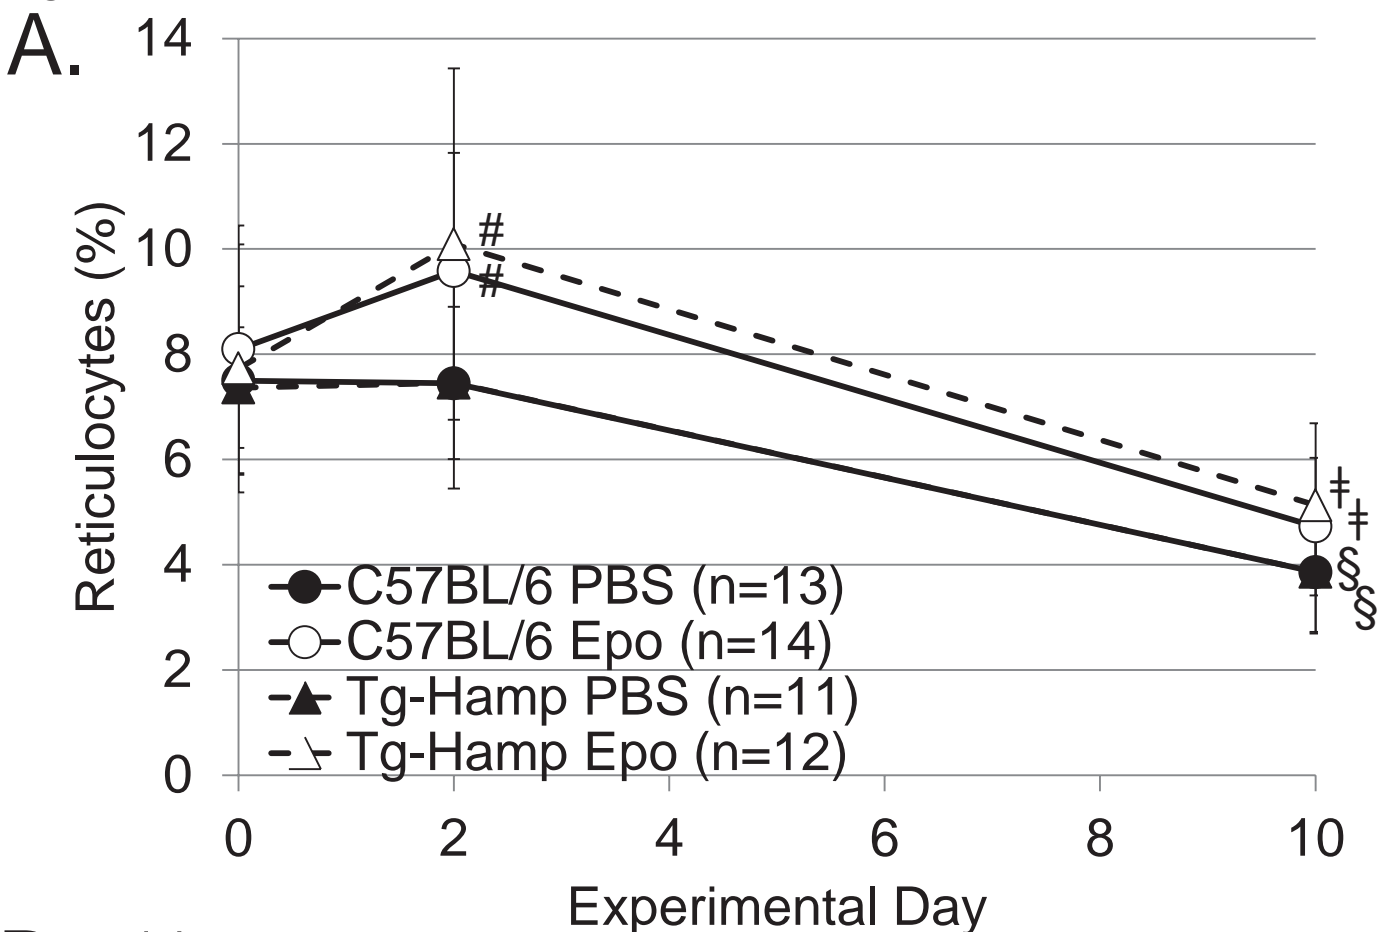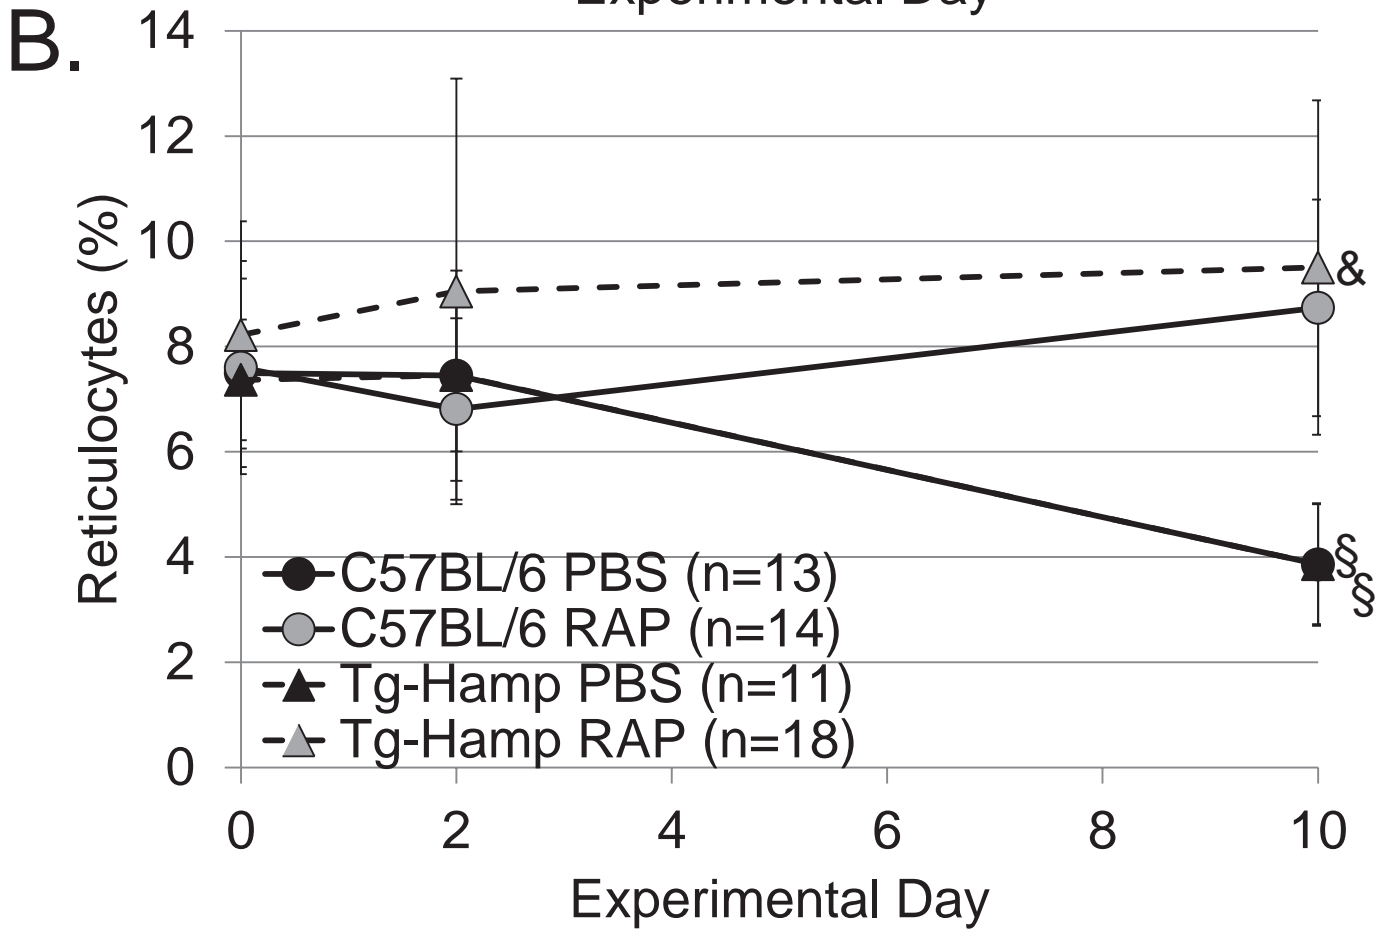

Figure S3

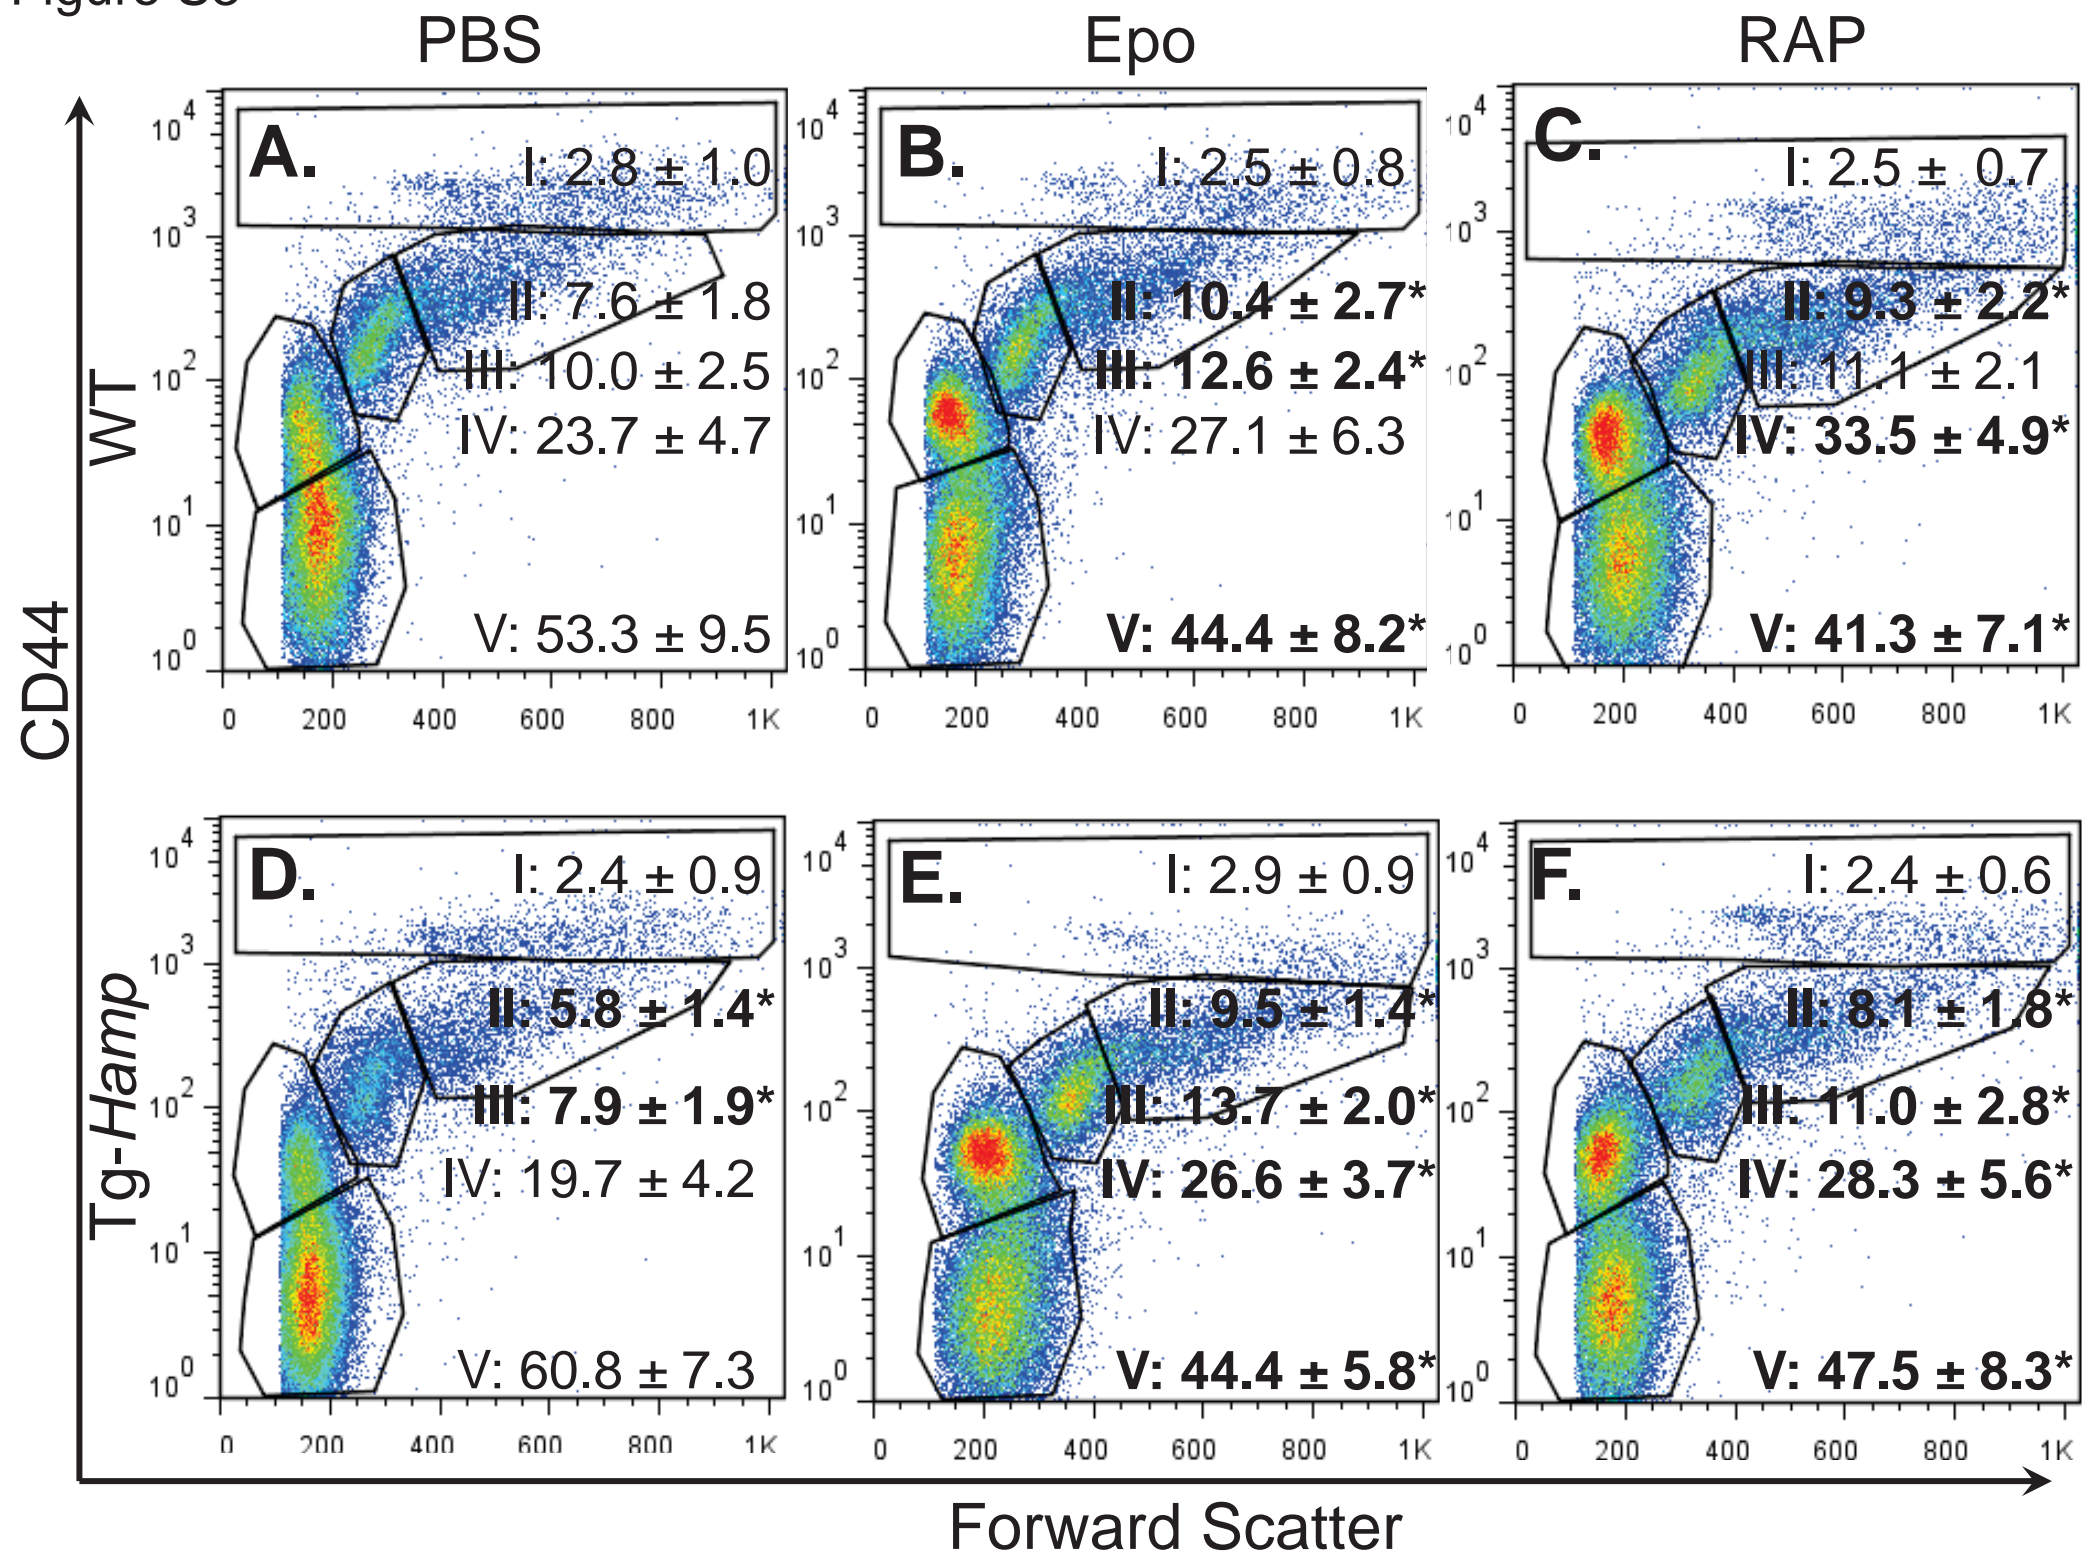

Supplement: NIHMS629770-supplement-Supp_FigureS1-S3.pdf [file NIHMS629770-supplement-Supp_FigureS1-S3.pdf]
